# Supplementary material for: Evaluation of regional background particulate matter concentration based on vertical distribution characteristics
Source: Copernicus journal article supplement (doi:10.5194/acp-15-11165-2015), 2015-10-07
Supplement: Supplementary file [file acp-15-11165-2015-supplement-title-page.pdf › acp-15-11165-2015-supplement-title-page.pdf]

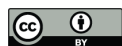

## *Supplement of*

# **Evaluation of regional background particulate matter concentration based on vertical distribution characteristics**

**S. Han et al.**

*Correspondence to:* Y. Zhang (zhafox@126.com) and Y. Feng (fengyc@nankai.edu.cn)

- [acp-15-11165-2015-supplement-title-page.pdf](#)
- Supplemental Fig-S1
  - [Fig. S1-fall.jpg](#)
  - [Fig. S1-spring.jpg](#)
  - [Fig. S1-summer.jpg](#)
  - [Fig. s1-winter.jpg](#)

The copyright of individual parts of the supplement might differ from the CC-BY 3.0 licence.
